# Supplementary material
Source: Springer Nature journal article supplement (https://www.springermedizin.de/resource/supplementary/12875_2008_317_MOESM1_ESM.pdf/9436736)
Supplement: MOESM1 [file 9436736]

| <b>Stage</b>                  | <b>Content</b>                                                                                                                                             |
|-------------------------------|------------------------------------------------------------------------------------------------------------------------------------------------------------|
| Feeling understood            | Elicit physical symptoms, psychosocial problems, mood state, beliefs held by patient about their problem, relevant physical examination and investigations |
| Broadening the agenda         | Summarise physical and psychosocial findings. Negotiate these findings with patient                                                                        |
| Making the link               | Give explanation relating physical symptom to psychosocial problems of lifestyle because of link in time or physiology                                     |
| Negotiating further treatment | Arrange follow up or treatment of symptoms, psychosocial problems or mental disorder                                                                       |
